# Supplementary material for: Youth-centred participatory action approach towards co-created implementation of socially and physically activating environmental interventions in Africa and Europe: the YoPA project study protocol
Source: PubMed Central journal article supplement (PMC10882351; doi:10.1136/bmjopen-2024-084657), 2024-02-21
Supplement: bmjopen-2024-084657.reviewer_comments.pdf [file bmjopen-2024-084657.reviewer_comments.pdf]

## PEER REVIEW HISTORY

BMJ Open publishes all reviews undertaken for accepted manuscripts. Reviewers are asked to complete a checklist review form (<http://bmjopen.bmj.com/site/about/resources/checklist.pdf>) and are provided with free text boxes to elaborate on their assessment. These free text comments are reproduced below.

## ARTICLE DETAILS

|                            |                                                                                                                                                                                                         |
|----------------------------|---------------------------------------------------------------------------------------------------------------------------------------------------------------------------------------------------------|
| <b>TITLE (PROVISIONAL)</b> | A Youth-centred Participatory Action approach towards co-created implementation of socially and physically activating environmental interventions in Africa and Europe: the YoPA project study protocol |
| <b>AUTHORS</b>             | Chinapaw, Mai; Klaufus, Leonie; Oyeyemi, Adewale; Draper, Catherine; Palmeira, António L.; Silva, Marlene Nunes; Van Belle, Sara; Pawlowski, Charlotte; Schipperijn, Jasper; Altenburg, Teatske         |

This article was not externally reviewed at BMJ Open. Protocols that have been independently assessed prior to submission to BMJ Open are usually fast-tracked to publication on the grounds that further substantial changes will not be possible. This independent assessment will usually be external, independent review for both a substantial grant award from a non-commercial or government funder and ethics approval.
